# Supplementary material for: Hepatocellular carcinoma incidence is decreasing in Korea but increasing in the very elderly
Source: PubMed Central journal article supplement — Clin Mol Hepatol. 2022 Aug 12;29(1):120–34. doi: 10.3350/cmh.2021.0395 (PMC9845660; doi:10.3350/cmh.2021.0395), 2022-08-12
Supplement: cmh-2021-0395-Supplementary-Fig-3.pdf [file cmh-2021-0395-Supplementary-Fig-3.pdf]

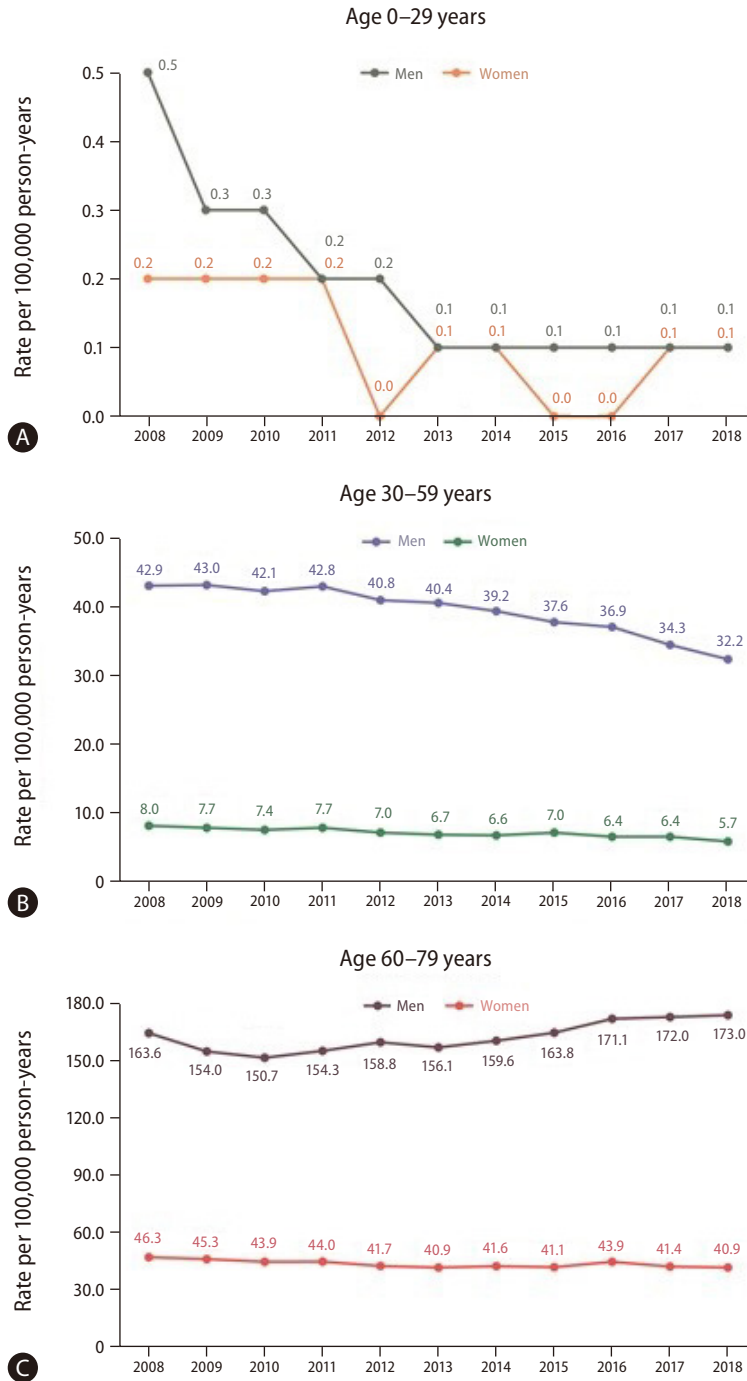

**Supplementary Figure 3.** Age-standardized incidence rate of hepatocellular carcinoma by age groups. (A) Patients aged 0–29 years; (B) patients aged 30–59 years; (C) patients aged 60–79 years.
