# Supplementary material for: Hepatocellular carcinoma incidence is decreasing in Korea but increasing in the very elderly
Source: PubMed Central journal article supplement — Clin Mol Hepatol. 2022 Aug 12;29(1):120–34. doi: 10.3350/cmh.2021.0395 (PMC9845660; doi:10.3350/cmh.2021.0395), 2022-08-12
Supplement: cmh-2021-0395-Supplementary-Fig-4.pdf [file cmh-2021-0395-Supplementary-Fig-4.pdf]

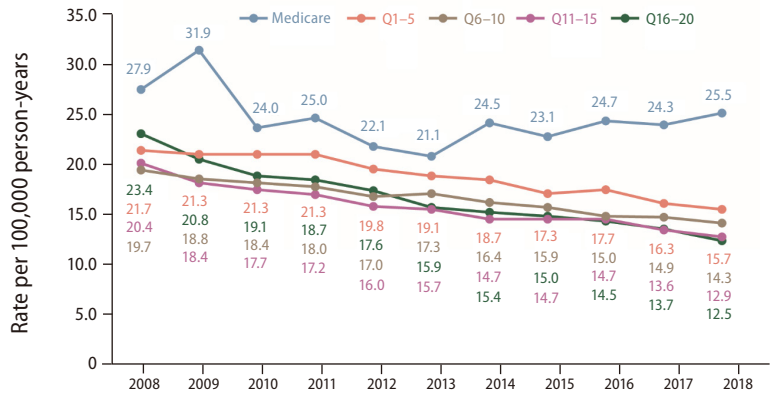

**Supplementary Figure 4.** Age-standardized incidence rates of hepatocellular carcinoma by economic classes.
