# Supplementary material for: Hepatocellular carcinoma incidence is decreasing in Korea but increasing in the very elderly
Source: PubMed Central journal article supplement — Clin Mol Hepatol. 2022 Aug 12;29(1):120–34. doi: 10.3350/cmh.2021.0395 (PMC9845660; doi:10.3350/cmh.2021.0395), 2022-08-12
Supplement: cmh-2021-0395-Supplementary-Table-1.pdf [file cmh-2021-0395-Supplementary-Table-1.pdf]

**Supplementary Table 1.** Identification of etiologies and comorbid conditions

|                                   | ICD code for diagnosis                                                                                                                                                                                                                                                 | Antiviral treatment                                                                                                                                                                                                         |
|-----------------------------------|------------------------------------------------------------------------------------------------------------------------------------------------------------------------------------------------------------------------------------------------------------------------|-----------------------------------------------------------------------------------------------------------------------------------------------------------------------------------------------------------------------------|
| <b>Etiologies</b>                 |                                                                                                                                                                                                                                                                        |                                                                                                                                                                                                                             |
| Chronic hepatitis B               | Z22.51, B18.0, B18.1, B18.10, or B18.18                                                                                                                                                                                                                                | lamivudine, adefovir, entecavir, tenofovir alafenamide, tenofovir fumarate, telbivudine, clevudine, or besifovir                                                                                                            |
| Chronic hepatitis C               | B18.2 or Z22.52                                                                                                                                                                                                                                                        | Pegylated interferon and ribavirin, or oral antiviral agents (daclatasvir, asunaprevir, sofosbuvir/ledipasvir, elbasvir/grazoprevir, ombitasvir/paritaprevir/ritonavir, dasabuvir, sofosbuvir, or glecaprevir/pibrentasvir) |
| Alcoholic liver disease           | K70.0, K70.1, K70.2, K70.3, K70.4, or K70.9                                                                                                                                                                                                                            |                                                                                                                                                                                                                             |
| Non-alcoholic fatty liver disease | NAFLD (K76.0, K76.0A, or K75.8B) or diabetes mellitus (E10, E11, E12, E13, E14, or E15), and not assigned with ICD codes for chronic hepatitis B, chronic hepatitis C, alcoholic liver disease, Wilson's disease, autoimmune hepatitis, or primary biliary cholangitis |                                                                                                                                                                                                                             |
| <b>Comorbid conditions</b>        |                                                                                                                                                                                                                                                                        |                                                                                                                                                                                                                             |
| Liver cirrhosis                   | Liver cirrhosis (K74, K70.2, or K70.3) or cirrhosis-related complications (K76.6, I85, I86.4, K70.43, K71.11, K72.01, or K72.91)                                                                                                                                       |                                                                                                                                                                                                                             |
| Diabetes mellitus                 | E10, E11, E12, E13, E14, or E15                                                                                                                                                                                                                                        |                                                                                                                                                                                                                             |
| Hypertension                      | I10, I11, I12, or I13                                                                                                                                                                                                                                                  |                                                                                                                                                                                                                             |
| Chronic kidney disease            | N18 or N19                                                                                                                                                                                                                                                             |                                                                                                                                                                                                                             |
| Other malignancies                | All cancer codes beginning with C                                                                                                                                                                                                                                      |                                                                                                                                                                                                                             |
| Cardiovascular diseases           | I20, I21, I22, I23, I24, or I25                                                                                                                                                                                                                                        |                                                                                                                                                                                                                             |
| Cerebrovascular diseases          | I60, I61, I62, I63, I64, I65, I66, or I69                                                                                                                                                                                                                              |                                                                                                                                                                                                                             |

NAFLD, non-alcoholic fatty liver disease; ICD, International Classification of Diseases.
