# Supplementary material for: Hepatocellular carcinoma incidence is decreasing in Korea but increasing in the very elderly
Source: PubMed Central journal article supplement — Clin Mol Hepatol. 2022 Aug 12;29(1):120–34. doi: 10.3350/cmh.2021.0395 (PMC9845660; doi:10.3350/cmh.2021.0395), 2022-08-12
Supplement: cmh-2021-0395-Supplementary-Table-2.pdf [file cmh-2021-0395-Supplementary-Table-2.pdf]

**Supplementary Table 2.** Annual numbers and crude rate of hepatocellular carcinoma by age

| Age                           | 2008  | 2009  | 2010  | 2011  | 2012  | 2013  | 2014  | 2015  | 2016  | 2017  | 2018  | AAPC  | 95% CI        | P-value |
|-------------------------------|-------|-------|-------|-------|-------|-------|-------|-------|-------|-------|-------|-------|---------------|---------|
| <b>0–29 years</b>             |       |       |       |       |       |       |       |       |       |       |       |       |               |         |
| Numbers                       |       |       |       |       |       |       |       |       |       |       |       |       |               |         |
| All                           | 75    | 58    | 50    | 42    | 26    | 18    | 25    | 19    | 16    | 13    | 23    | -14.3 | -19.3 to -9.0 | <0.001  |
| Men                           | 51    | 35    | 32    | 24    | 21    | 12    | 16    | 14    | 12    | 7     | 14    | -14.5 | -19.2 to -9.5 | <0.001  |
| Women                         | 24    | 23    | 18    | 18    | 5     | 6     | 9     | 5     | 4     | 6     | 9     | -9.9  | -28.2 to 13.1 | 0.369   |
| CR (per 100,000 person-years) |       |       |       |       |       |       |       |       |       |       |       |       |               |         |
| All                           | 0.3   | 0.3   | 0.2   | 0.2   | 0.1   | 0.1   | 0.1   | 0.1   | 0.0   | 0.0   | 0.1   | -23.5 | -35. to -8.8  | 0.007   |
| Men                           | 0.5   | 0.3   | 0.3   | 0.2   | 0.2   | 0.1   | 0.1   | 0.1   | 0.1   | 0.0   | 0.1   | -21.8 | -32.1 to -9.9 | 0.003   |
| Women                         | 0.2   | 0.2   | 0.2   | 0.2   | 0.0   | 0.0   | 0.1   | 0.0   | 0.0   | 0.0   | 0.0   | -22.6 | -41.0 to 1.6  | 0.062   |
| <b>30–59 years</b>            |       |       |       |       |       |       |       |       |       |       |       |       |               |         |
| Numbers                       |       |       |       |       |       |       |       |       |       |       |       |       |               |         |
| All                           | 5,861 | 5,833 | 5,696 | 5,810 | 5,494 | 5,420 | 5,263 | 5,127 | 4,985 | 4,679 | 4,359 | -3.1  | -4.1 to -2.1  | <0.001  |
| Men                           | 4,965 | 4,976 | 4,865 | 4,950 | 4,714 | 4,671 | 4,527 | 4,350 | 4,267 | 3,961 | 3,722 | -2.9  | -3.6 to -2.1  | <0.001  |
| Women                         | 896   | 857   | 831   | 860   | 780   | 749   | 736   | 777   | 718   | 718   | 637   | -2.8  | -3.6 to -2.0  | <0.001  |
| CR (per 100,000 person-years) |       |       |       |       |       |       |       |       |       |       |       |       |               |         |
| All                           | 24.8  | 24.3  | 23.3  | 23.4  | 22.0  | 21.5  | 20.8  | 19.8  | 19.6  | 18.7  | 17.5  | -3.5  | -4.1 to -2.8  | <0.001  |
| Men                           | 41.2  | 40.7  | 39.2  | 39.3  | 37.1  | 36.5  | 35.3  | 33.9  | 33.3  | 31.1  | 29.4  | -3.5  | -4.3 to -2.7  | <0.001  |
| Women                         | 7.7   | 7.2   | 6.9   | 7.0   | 6.3   | 6.0   | 5.9   | 6.2   | 5.8   | 5.8   | 5.2   | -3.3  | -4.1 to -2.5  | <0.001  |
| <b>60–79 years</b>            |       |       |       |       |       |       |       |       |       |       |       |       |               |         |
| Numbers                       |       |       |       |       |       |       |       |       |       |       |       |       |               |         |
| All                           | 5,599 | 5,328 | 5,200 | 5,294 | 5,333 | 5,238 | 5,346 | 5,438 | 5,713 | 5,653 | 5,660 | 0.2   | -0.8 to 1.3   | 0.702   |
| Men                           | 4,102 | 3,862 | 3,778 | 3,870 | 3,983 | 3,914 | 4,001 | 4,108 | 4,291 | 4,313 | 4,337 | 0.7   | -0.2 to 1.6   | 0.133   |
| Women                         | 1,497 | 1,466 | 1,422 | 1,424 | 1,350 | 1,324 | 1,345 | 1,330 | 1,422 | 1,340 | 1,323 | -1.0  | -1.7 to -0.4  | 0.007   |
| CR (per 100,000 person-years) |       |       |       |       |       |       |       |       |       |       |       |       |               |         |
| All                           | 87.2  | 80.1  | 75.7  | 75.1  | 72.4  | 68.7  | 67.3  | 65.2  | 65.5  | 61.8  | 59.1  | -3.6  | -4.5 to -2.7  | <0.001  |
| Men                           | 143.1 | 129.1 | 121.4 | 120.6 | 117.9 | 111.5 | 108.7 | 105.6 | 105.0 | 100.0 | 95.7  | -3.7  | -4.4 to -3.0  | <0.001  |
| Women                         | 42.1  | 40.0  | 37.8  | 37.1  | 33.8  | 32.2  | 31.6  | 29.8  | 30.6  | 27.6  | 26.2  | -4.4  | -5.0 to -3.9  | <0.001  |
| <b>≥80 years</b>              |       |       |       |       |       |       |       |       |       |       |       |       |               |         |
| Numbers                       |       |       |       |       |       |       |       |       |       |       |       |       |               |         |
| All                           | 521   | 525   | 598   | 642   | 665   | 739   | 821   | 917   | 1,000 | 1,112 | 1,192 | 9.9   | 7.9 to 10.2   | <0.001  |

Supplementary Table 2. Continued

| Age                           | 2008  | 2009  | 2010  | 2011  | 2012  | 2013  | 2014  | 2015  | 2016  | 2017  | 2018  | AAPC | 95% CI      | P-value |
|-------------------------------|-------|-------|-------|-------|-------|-------|-------|-------|-------|-------|-------|------|-------------|---------|
| Men                           | 304   | 292   | 330   | 362   | 386   | 416   | 473   | 550   | 566   | 619   | 704   | 9.4  | 8.4 to 10.4 | <0.001  |
| Women                         | 217   | 233   | 268   | 280   | 279   | 323   | 348   | 367   | 434   | 493   | 488   | 8.8  | 7.7 to 9.9  | <0.001  |
| CR (per 100,000 person-years) |       |       |       |       |       |       |       |       |       |       |       |      |             |         |
| All                           | 58.5  | 55.0  | 58.4  | 59.0  | 56.7  | 58.8  | 60.3  | 61.8  | 62.5  | 64.7  | 64.6  | 1.4  | 0.8 to 1.9  | <0.001  |
| Men                           | 115.7 | 103.5 | 109.8 | 113.0 | 110.7 | 110.1 | 113.5 | 119.1 | 111.7 | 111.7 | 116.4 | 0.4  | -0.3 to 1.2 | 0.195   |
| Women                         | 34.6  | 34.6  | 37.0  | 36.4  | 33.8  | 36.8  | 36.8  | 35.9  | 39.7  | 42.3  | 39.4  | 1.5  | 0.6 to 2.6  | 0.005   |

AAPC, average annual percent change; CI, confidence interval; CR, crude incidence rate.
