# Supplementary material for: Hepatocellular carcinoma incidence is decreasing in Korea but increasing in the very elderly
Source: PubMed Central journal article supplement — Clin Mol Hepatol. 2022 Aug 12;29(1):120–34. doi: 10.3350/cmh.2021.0395 (PMC9845660; doi:10.3350/cmh.2021.0395), 2022-08-12
Supplement: cmh-2021-0395-Supplementary-Table-3.pdf [file cmh-2021-0395-Supplementary-Table-3.pdf]

**Supplementary Table 3.** Average annual percent changes in age-standardized incidence rate of hepatocellular carcinoma by economic classes (2008–2018)

| Medical insurance groups | AAPC  | 95% CI         | P-value |
|--------------------------|-------|----------------|---------|
| Medicare                 | -1.40 | -3.60 to 0.90  | 0.202   |
| Q1–5                     | -3.20 | -3.70 to -2.60 | <0.001  |
| Q6–10                    | -3.20 | -3.70 to -2.70 | <0.001  |
| Q11–15                   | -4.00 | -4.60 to -3.40 | <0.001  |
| Q16–20                   | -5.50 | -6.10 to -4.90 | <0.001  |

AAPC, average annual percent change; CI, confidence interval.
