# Supplementary material for: Hepatocellular carcinoma incidence is decreasing in Korea but increasing in the very elderly
Source: PubMed Central journal article supplement — Clin Mol Hepatol. 2022 Aug 12;29(1):120–34. doi: 10.3350/cmh.2021.0395 (PMC9845660; doi:10.3350/cmh.2021.0395), 2022-08-12
Supplement: cmh-2021-0395-Supplementary-Table-4.pdf [file cmh-2021-0395-Supplementary-Table-4.pdf]

**Supplementary Table 4.** Etiologies of hepatocellular carcinoma according to economic class (2008–2018)

|         | Medicare | Q1–5 | Q6–10 | Q11–15 | Q16–20 |
|---------|----------|------|-------|--------|--------|
| HBV     | 64.1     | 64.9 | 61.5  | 63.0   | 64.1   |
| HCV     | 9.9      | 9.7  | 10.5  | 9.7    | 10.0   |
| Alcohol | 11.5     | 9.4  | 11.5  | 10.6   | 10.6   |
| NAFLD   | 9.7      | 11.0 | 10.6  | 10.7   | 9.0    |
| Others  | 4.8      | 5.0  | 5.9   | 6.0    | 6.3    |

HBV, hepatitis B virus; HCV, hepatitis C virus; NAFLD, non-alcoholic fatty liver disease.
