# Supplementary material for: Hepatocellular carcinoma incidence is decreasing in Korea but increasing in the very elderly
Source: PubMed Central journal article supplement — Clin Mol Hepatol. 2022 Aug 12;29(1):120–34. doi: 10.3350/cmh.2021.0395 (PMC9845660; doi:10.3350/cmh.2021.0395), 2022-08-12
Supplement: cmh-2021-0395-Supplementary-Table-5.pdf [file cmh-2021-0395-Supplementary-Table-5.pdf]

**Supplementary Table 5.** Antiviral treatment uptake in HBV related HCC patients by medical insurances quantile

|              | 2008 | 2009 | 2010 | 2011 | 2012 | 2013 | 2014 | 2015 | 2016 | 2017 | 2018 |
|--------------|------|------|------|------|------|------|------|------|------|------|------|
| Medicare (%) | 39.1 | 44.8 | 51.3 | 48.8 | 52.4 | 56.4 | 56.3 | 57.9 | 67.4 | 67.2 | 64.3 |
| Q1-5 (%)     | 34.4 | 39.2 | 47.8 | 52.7 | 56.9 | 55.0 | 56.3 | 61.9 | 68.7 | 69.0 | 68.3 |
| Q6-10 (%)    | 37.4 | 40.1 | 48.9 | 52.0 | 56.0 | 58.2 | 60.0 | 64.5 | 67.4 | 69.5 | 66.8 |
| Q11-15 (%)   | 40.8 | 43.3 | 49.9 | 55.3 | 60.2 | 59.2 | 59.9 | 68.2 | 70.3 | 72.6 | 70.5 |
| Q16-20 (%)   | 41.6 | 47.0 | 53.2 | 55.7 | 59.7 | 61.6 | 61.7 | 66.8 | 72.8 | 72.4 | 73.2 |

HBV, hepatitis B virus; HCC, hepatocellular carcinoma.
